## Evaluating long-term outcomes of left atrial appendage occlusion: the results of a prospective single-center registry

Maarse M.; Wintgens L.; Aarnink E.; Huijboom M.; Abeln B.; Klaver M.; Staal D.; Rensing B.; Van Dijk V.; Swaans M.; Boersma L.

St Antonius Hospital, Nieuwegein, Netherlands (The)

**Funding Acknowledgements:** Type of funding sources: Private grant(s) and/or Sponsorship. Main funding source(s): This work was supported by an unrestricted grant from Boston Scientific. Boston Scientific was not involved in the design/conduct of the study, data collection/analysis and interpretation of the data and preparation of the manuscript.

### Background

Percutaneous left atrial appendage occlusion is an emerging alternative to anticoagulation in the prevention for stroke in patients with atrial fibrillation, especially in patients with a contra-indication for oral anticoagulation therapy. Long-term results on the efficacy and safety of this treatment remain scarce.

### Methods

In this single-center prospective registry, data of all consecutive patients that underwent percutaneous left atrial appendage closure between 2009 and 2019 were collected. Patients with successful left atrial appendage closure (peri-device leakage  $\leq 5$ mm) and at least one year of follow-up data were analyzed. The occurrence of thrombo-embolic events (ischemic stroke, TIA and systemic embolism), major bleeding events (BARC  $>2$ ) and anticoagulation use during long-term follow-up were evaluated.

### Results

A total of 192 patients after left atrial appendage occlusion were included (61 % male, age  $69.0 \pm 8.4$  years, CHA<sub>2</sub>DS<sub>2</sub>-VASc 4.0[3.0-5.0], HAS-BLED 3.0[2.0-3.25]) with a mean follow-up duration of  $5.7 \pm 2.8$  years (in total 1087 patient-years). During follow-up 36 patients (19%) died. 49 thrombo-embolic complications were observed in 38 patients. The ischemic stroke rate was 1.9 events per 100 patient-years, accounting for a 70% reduction compared to CHA<sub>2</sub>DS<sub>2</sub>-VASc predicted rate. Device-related thrombus (DRT) occurred in 5 patients (2.6%), 3 were observed during routine follow-up and were not associated with thrombo-embolic complications. The other 2 DRT were observed in patients presenting with ischemic stroke more than 3 years after device implantation. Furthermore, 38 non-procedural major bleeding complications occurred in 19 patients, resulting in 3.5 events per 100-patients years, accounting for a reduction of 43% compared to estimated bleeding rates under OAC use. At the end of the study 71% of all patients were on single antiplatelet or no antiplatelet/anticoagulation treatment at all.

### Conclusions

During long-term follow-up thrombo-embolic event rates and non-procedural major bleeding rates were consistently low (ischemic stroke rate reduction 70% and non-procedural major bleeding rate reduction 40% compared to predicted rates). These results confirm the efficacy of left atrial appendage occlusion.

### Abstract Figure. Ischemic stroke rates

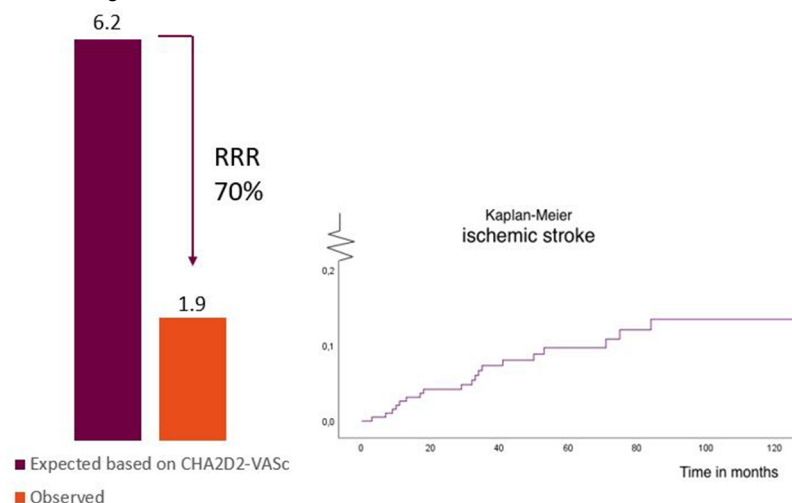

Source: http://academic.oup.com/europace/article-pdf/23/Supplement_3/euab116.287/38130619/euab116.287.pdf
